# Supplementary material
Source: Springer Nature journal article supplement (https://www.springermedizin.de/resource/supplementary/12943_2009_521_MOESM6_ESM.pdf/9555004)

SSC

Ctrl

Dji

TNF- $\alpha$ TNF- $\alpha$ +Dji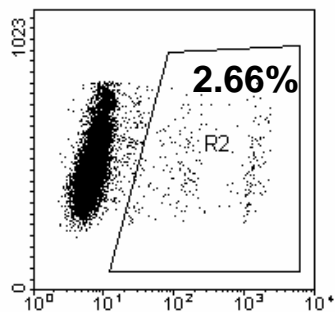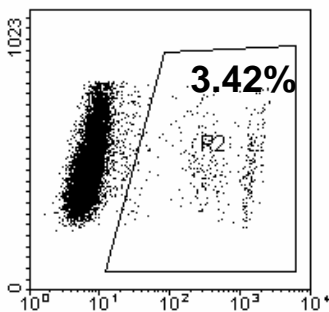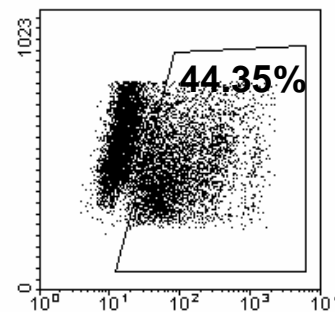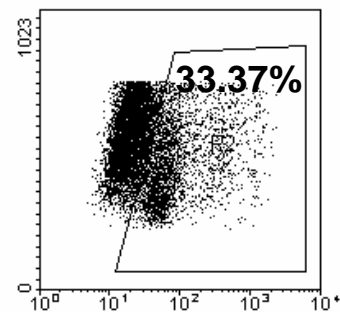

PI

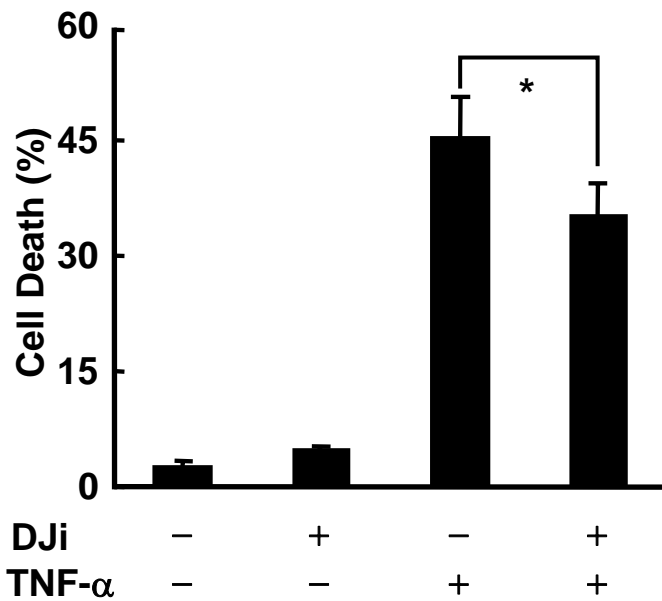

Supplement: MOESM6 [file 9555004]
